# Supplementary material for: The Deubiquitinase OTUB1 Is a Key Regulator of Energy Metabolism
Source: MDPI journal article supplement (doi:10.3390/ijms23031536), 2022-01-28
Supplement: s1 [file s1]

## **Supplementary Material**

### **The deubiquitinase OTUB1 is a key regulator of energy metabolism**

Amalia Ruiz-Serrano<sup>1</sup>, Christina N. Boyle<sup>2</sup>, Josep M. Monné Rodríguez<sup>3</sup>, Julia Günter<sup>1,4</sup>, Agnieszka E. Jucht<sup>1</sup>, Svende Pfundstein<sup>1</sup>, Andreas M. Bapst<sup>1</sup>, Thomas A. Lutz<sup>2</sup>, Roland H. Wenger<sup>1,4,\*</sup>, and Carsten C. Scholz<sup>1,4,\*</sup>

<sup>1</sup>Institute of Physiology, University of Zurich, Zurich, Switzerland. <sup>2</sup>Institute of Veterinary Physiology, University of Zurich, Zurich, Switzerland. <sup>3</sup>Laboratory for Animal Model Pathology (LAMP), Institute of Veterinary Pathology, University of Zurich, Zurich, Switzerland. <sup>4</sup>National Centre of Competence in Research 'Kidney.CH', Switzerland.

## Genotyping PCR primers

### Otub1<sup>fl/fl</sup>:

Ef\_5272: 5'-TCCACCCCTTCATCCTGCTTTCT-3'

Er\_5277: 5'-CAGACCAGAGCAGGATTAAGAAGCCTA-3'

### UBC-Cre<sup>ERT2</sup>:

UBCre 25285: 5'-GACGTCACCCGTTCTGTTG-3'

UBCre-olMR7338: 5'-CTAGGCCACAGAATTGAAAGATCT-3'

UBCre-olMR7339: 5'-GTAGGTGGAAATTCTAGCATC-3'

UBCre-olMR9074: 5'-AGGCAAATTTTGGTGTACGG-3'

### Otub1 iKO:

L3r\_5274: 5'-TCTACCCATCCCAACACCAGCAAG-3'

Ef\_5273: 5'-GAAGGACAAAGGGCGTGTCTCAGT-3'

### loxP:

Primer 1307 forw: 5'-GGCAGAAGCACGCTTATCG-3'

Primer 1307 rev: 5'-GACAAGCGTTAGTAGGCACAT-3'

## Supplementary Figures

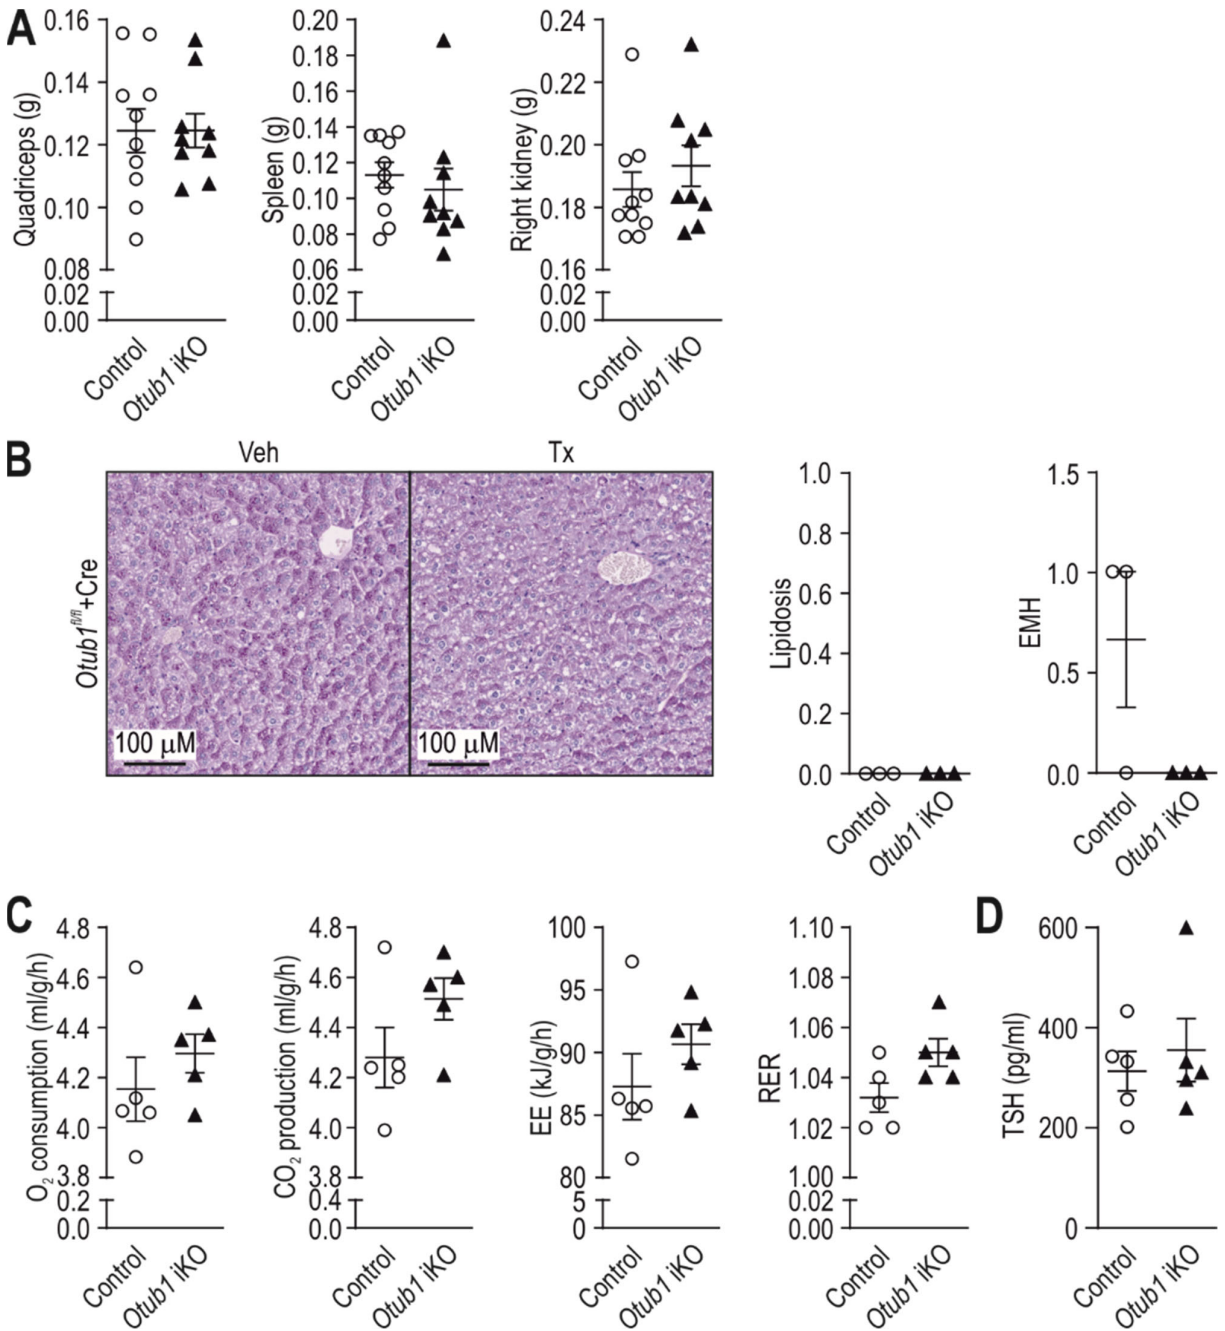

**Figure S1.** Energy metabolism in mice with induced *Otub1* ablation. **(A)** Weight of additional organs of the same mice shown in Figure 1C. **(B)** Representative periodic acid-Schiff (PAS) staining of transversal liver slices with scored lipidosis levels and extramedullary hematopoiesis (EMH) (n=3). **(C)** Averaged O<sub>2</sub> consumption, CO<sub>2</sub> production, energy expenditure (EE) and respiratory exchange ratio (RER) of 3 consecutive days during the night cycle (n=5). **(D)** Thyroid-stimulating hormone (TSH) plasma levels (n=5). All analyses were performed 5 months after *Otub1* deletion in 6.5 months old mice. Data are shown as mean ± SEM.

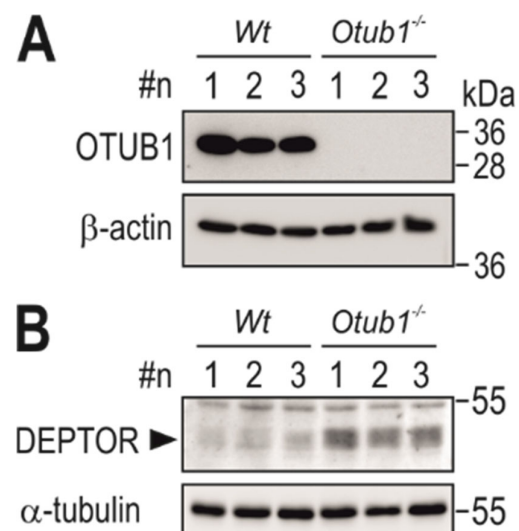

**Figure S2.** Generation of *Otub1*<sup>-/-</sup> mouse embryonic fibroblasts. (**A-B**) Immunoblotting of the indicated proteins in wildtype (*Wt*) and *Otub1*<sup>-/-</sup> cell lysates; #n, n-number; exp., exposure. Full-length immunoblots are shown in Figure S9.

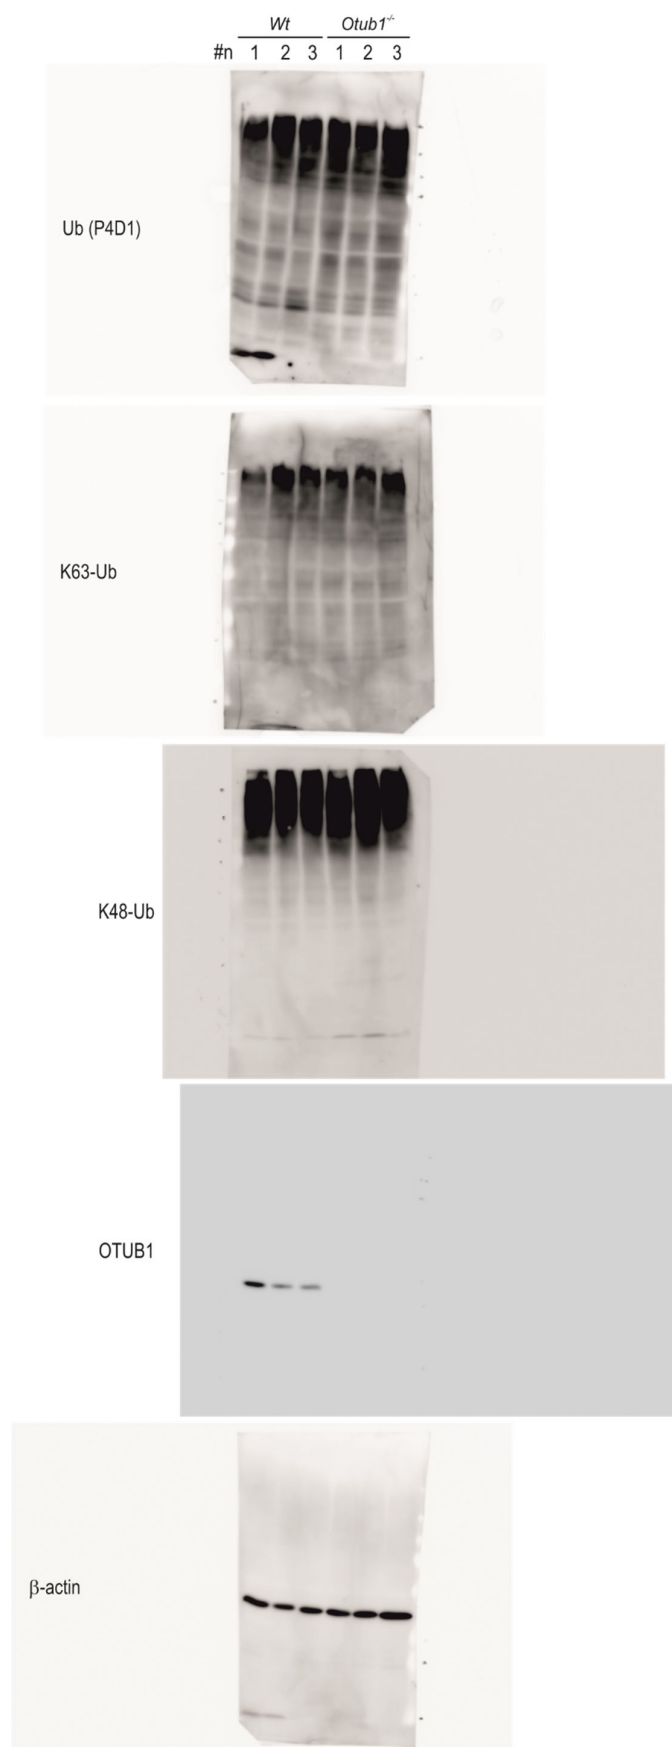

**Figure S3.** Full-length immunoblots of results shown in Figure 3A.

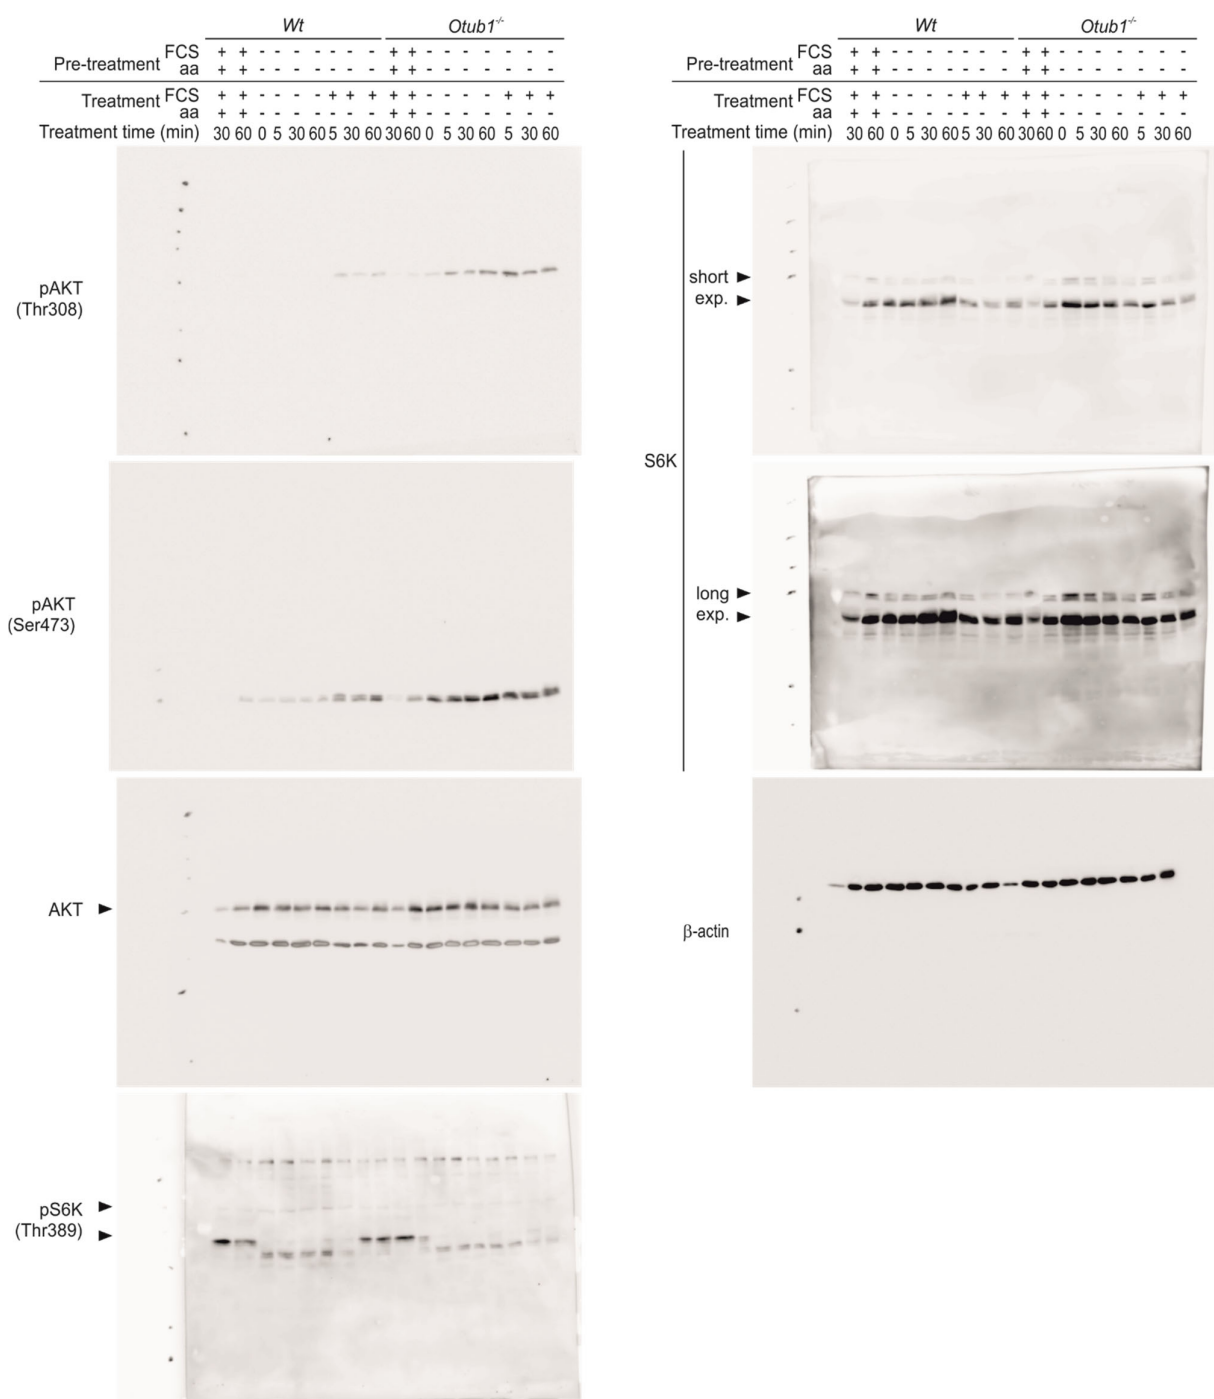

**Figure S4.** Full-length immunoblots of results shown in Figure 3B.

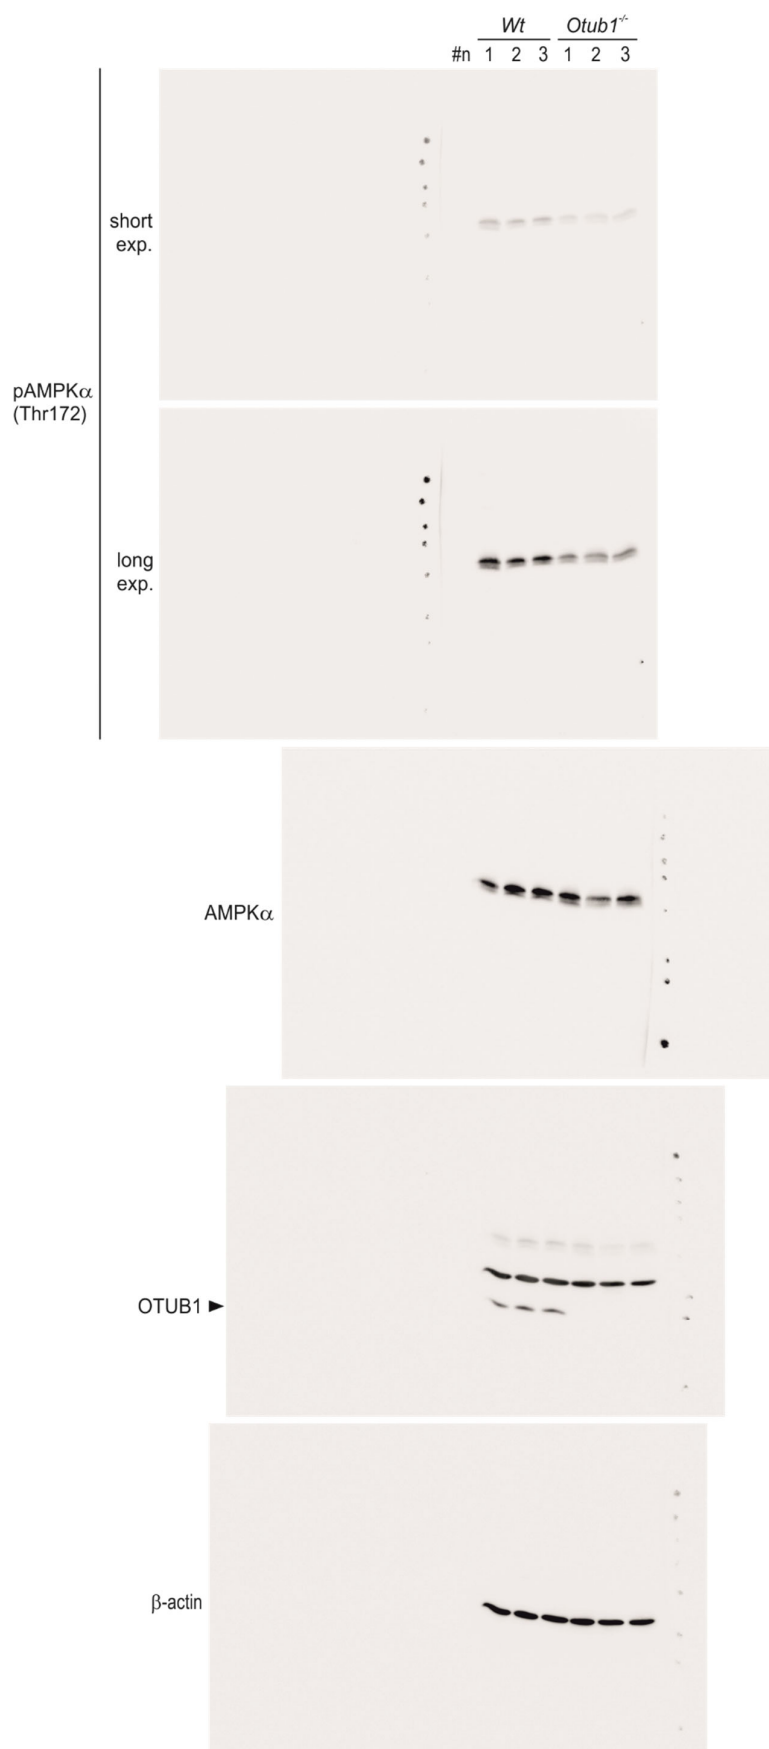

**Figure S5.** Full-length immunoblots of results shown in Figure 3F.

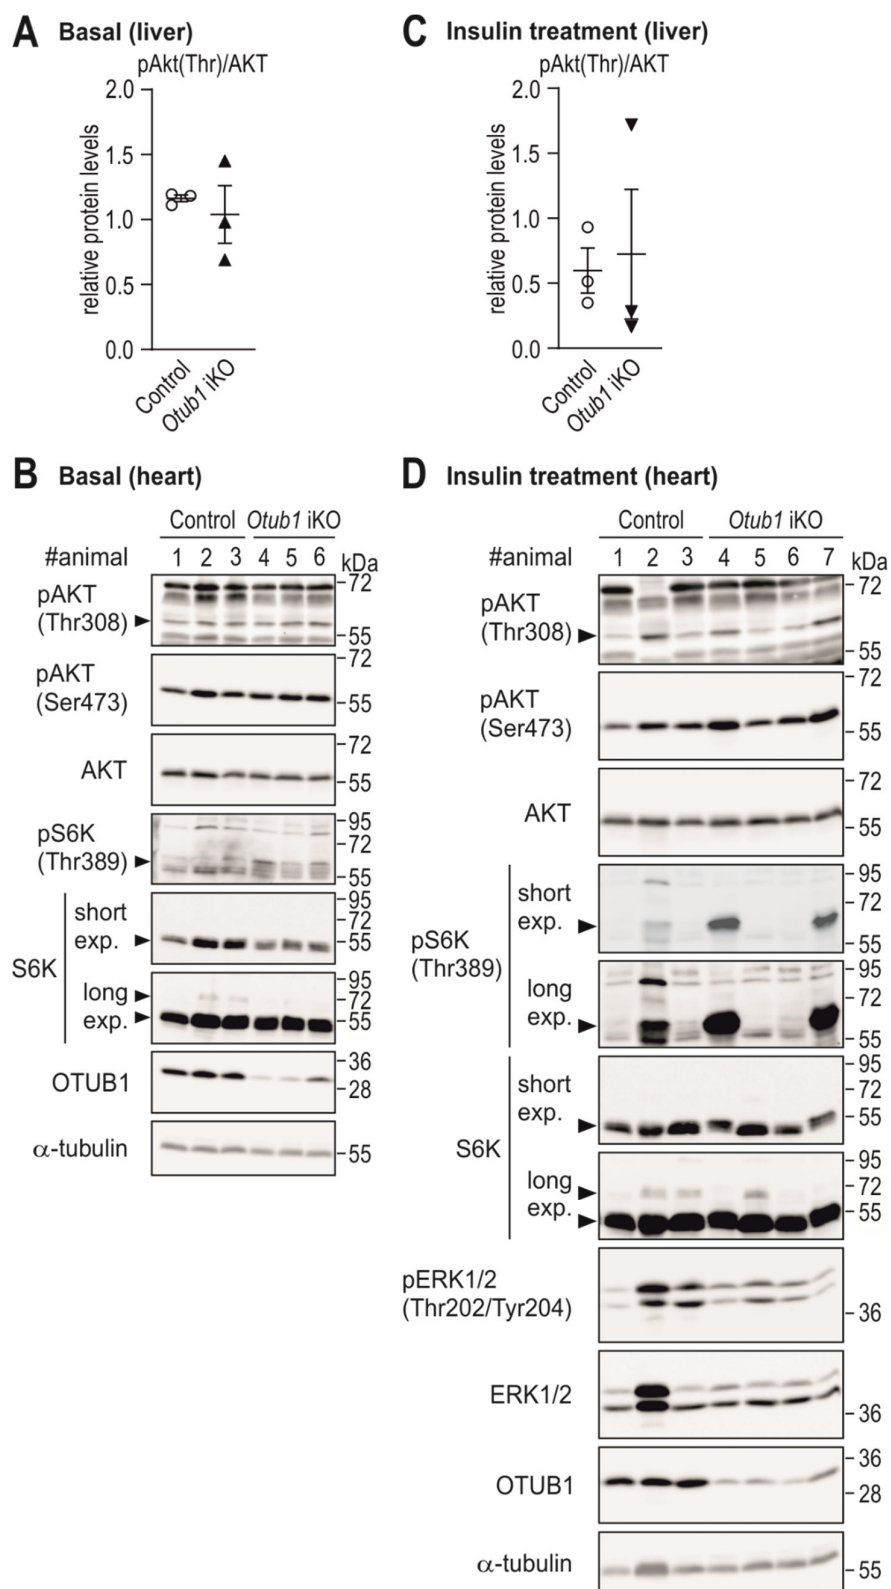

**Figure S6.** Protein levels in hearts of *Otub1* iKO mice. (**A, C**) Quantification of the indicated immunoblots shown in Figure 5 (normalized to loading control and the indicated protein). (**B**) Immunoblotting of the indicated proteins in heart lysates from control (with/without Cre and vehicle/tamoxifen treatment) and *Otub1* iKO mice (6 months after *Otub1* deletion; 8.5 months old;  $n = 3$ ). (**D**) 10 days after *Otub1* KO (2 months old), mice were starved overnight (16 h) followed by insulin IP application (0.75 mU insulin/g) 15 min prior to tissue harvest (control,  $n = 3$ ; *Otub1* iKO,  $n = 4$ ). Heart lysates were analysed by immunoblotting. #animal, animal number. Full-length immunoblots are shown in Figures S10 and S11.



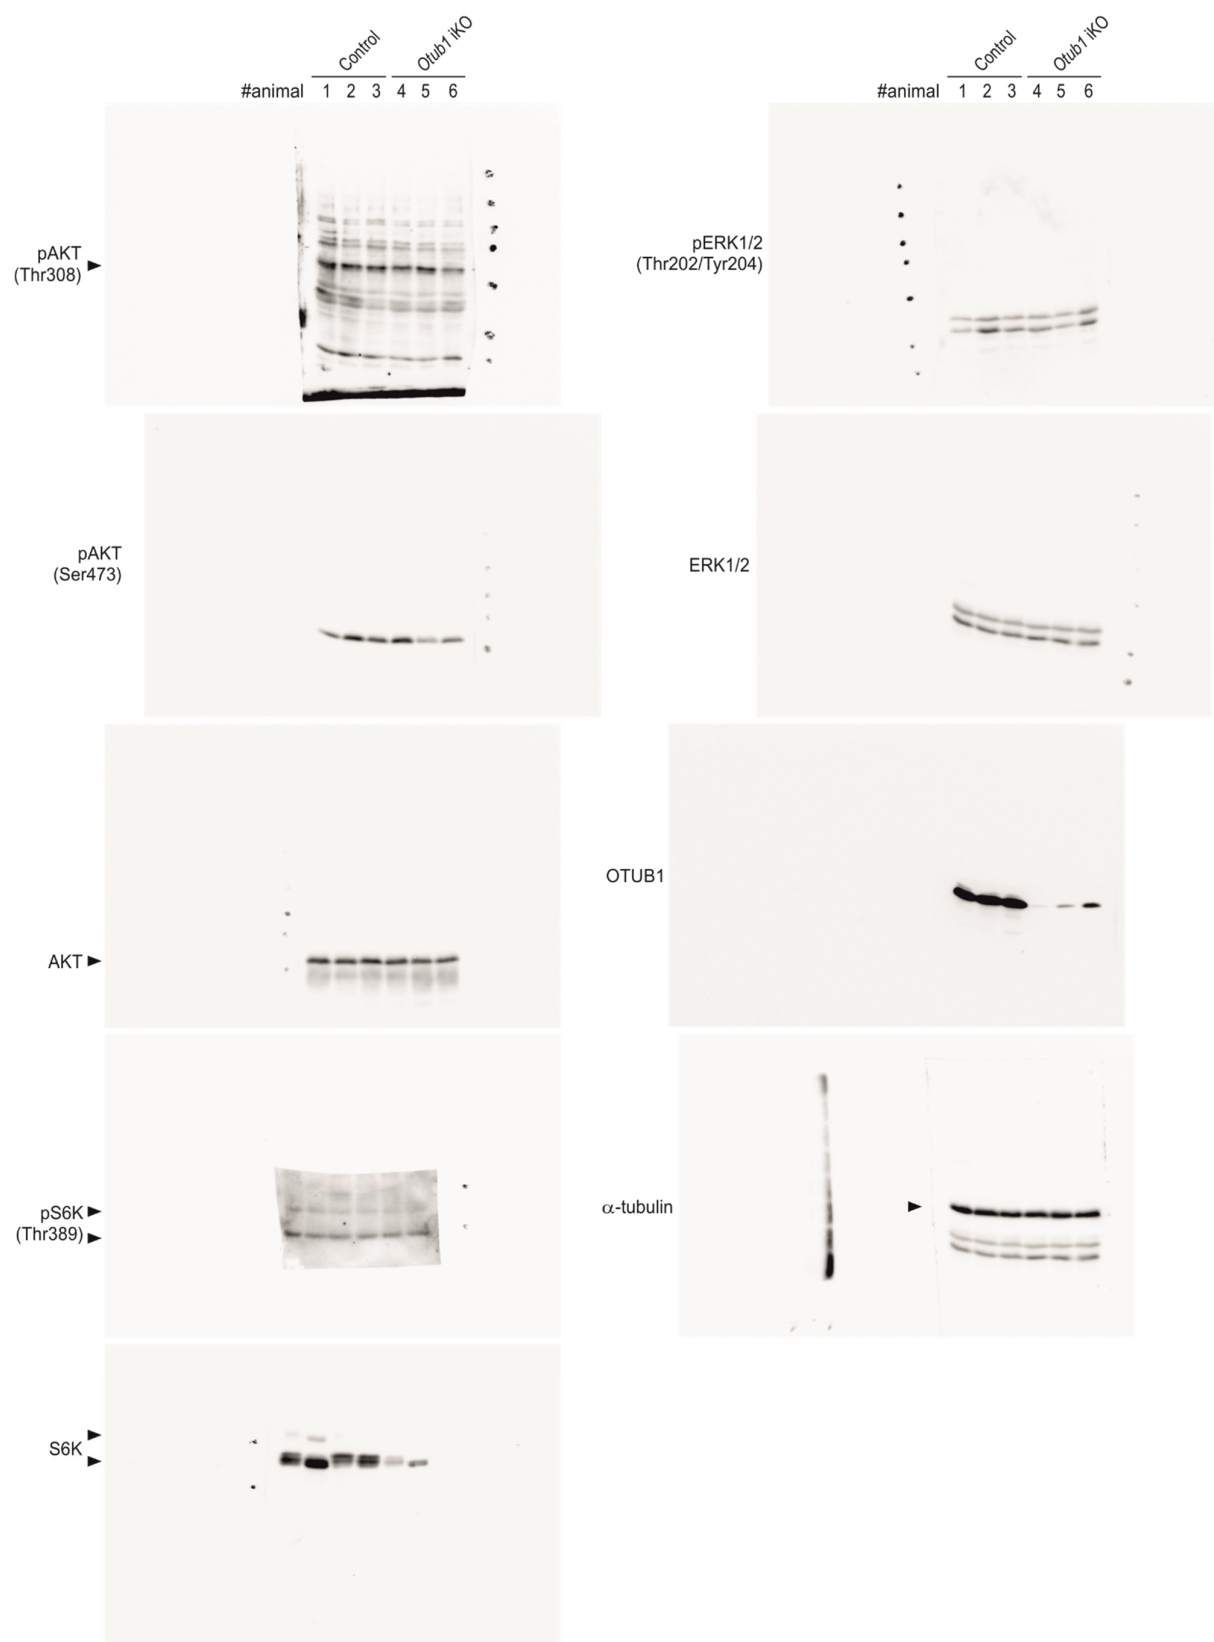

**Figure S7.** Full-length immunoblots of results shown in Figure 5A.

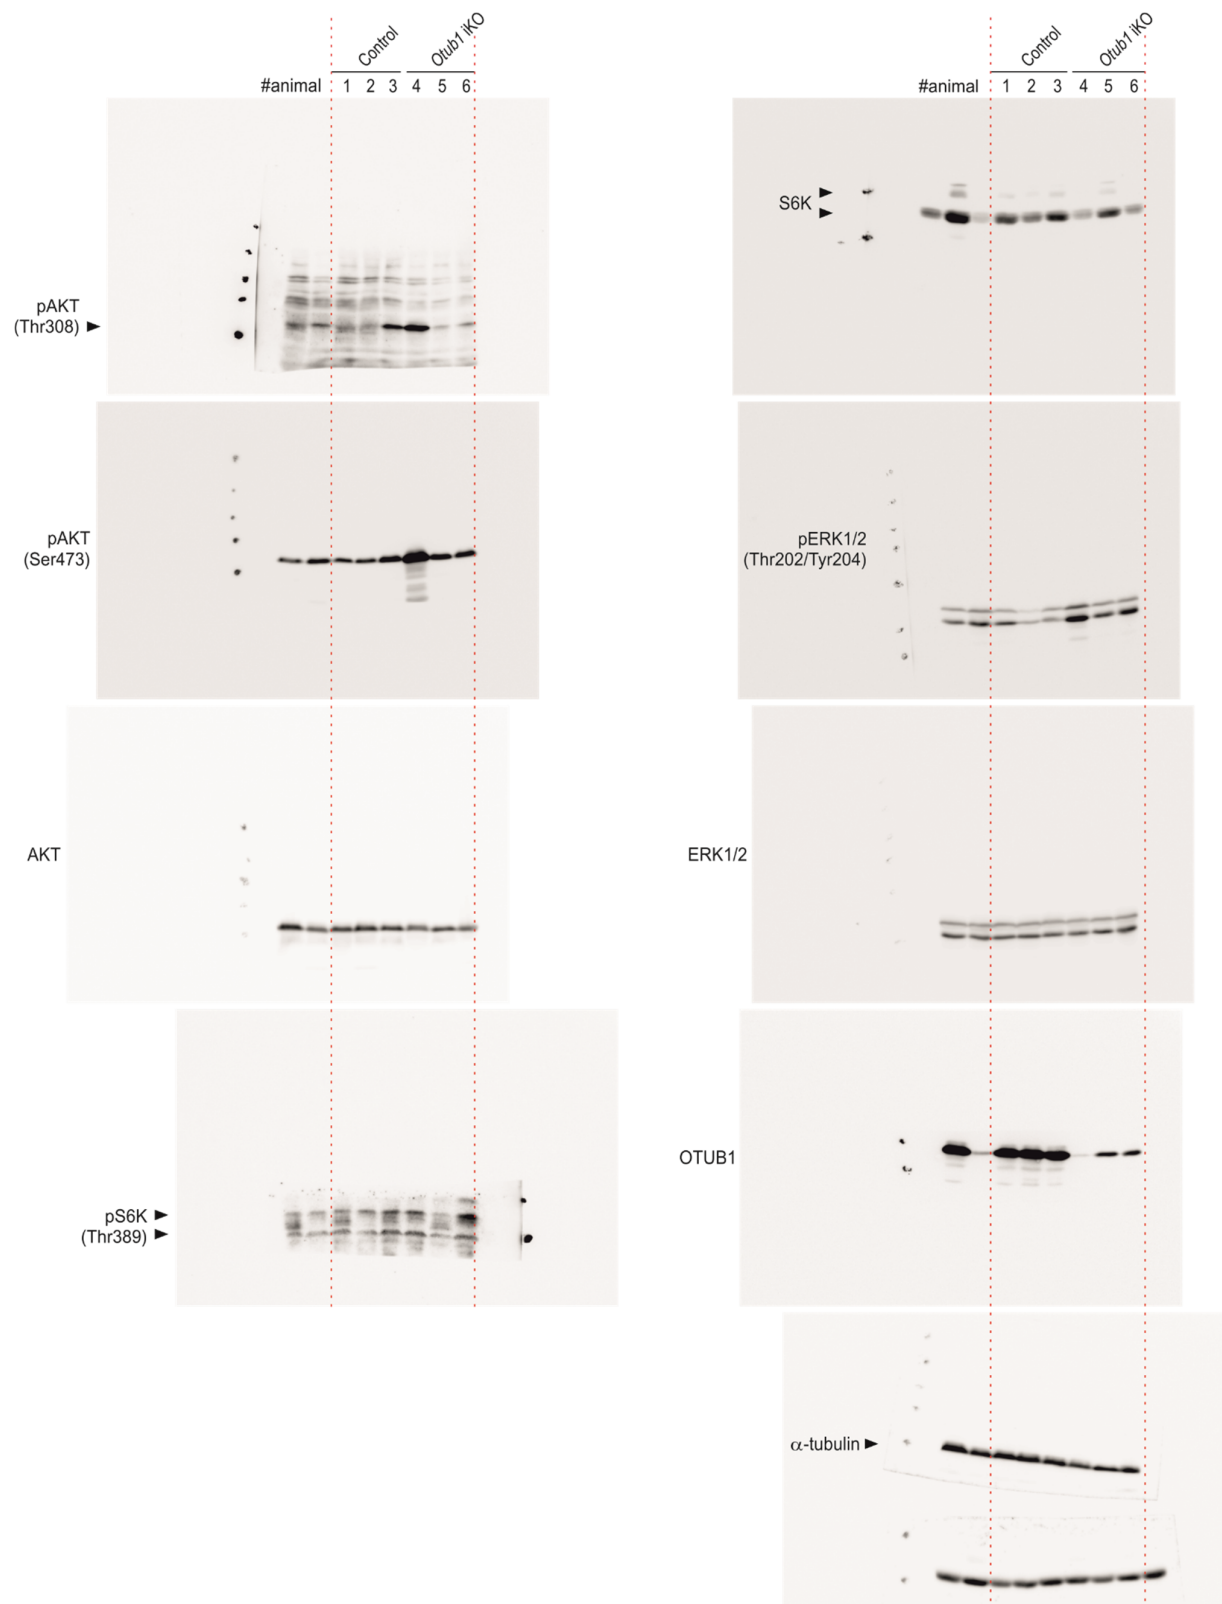

**Figure S8.** Full-length immunoblots of results shown in Figure 5B.

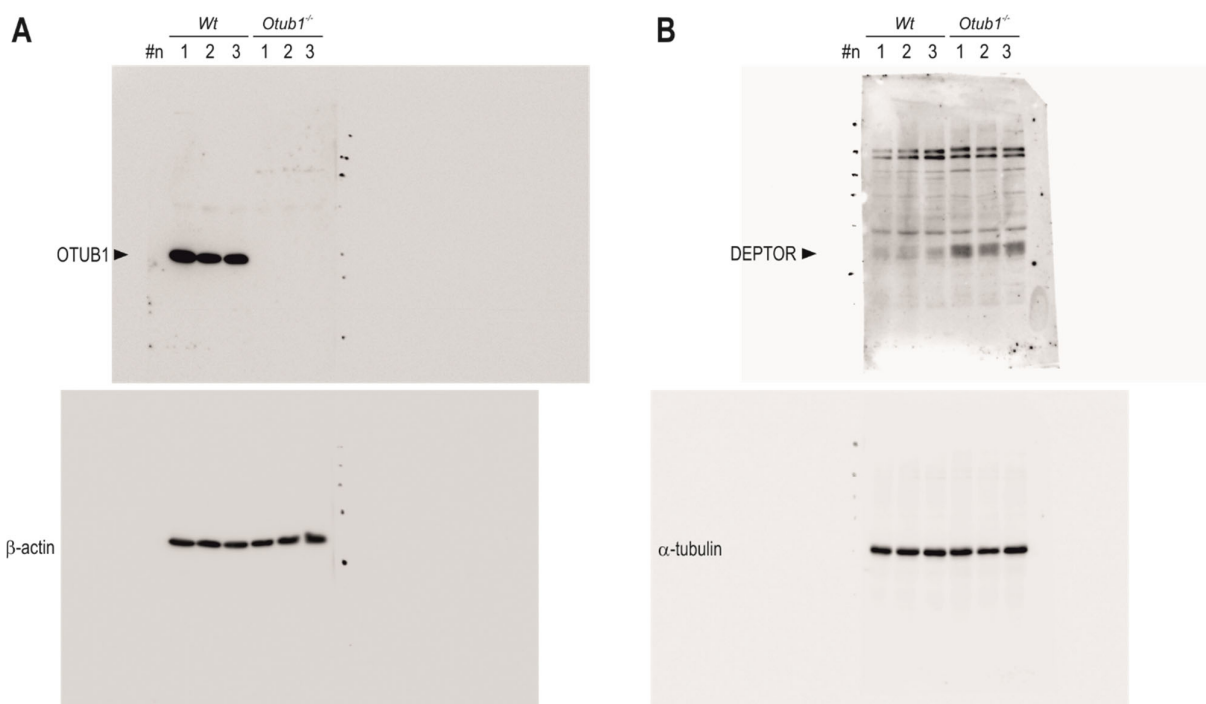

**Figure S9.** Full-length immunoblots of results shown in Figure S2.

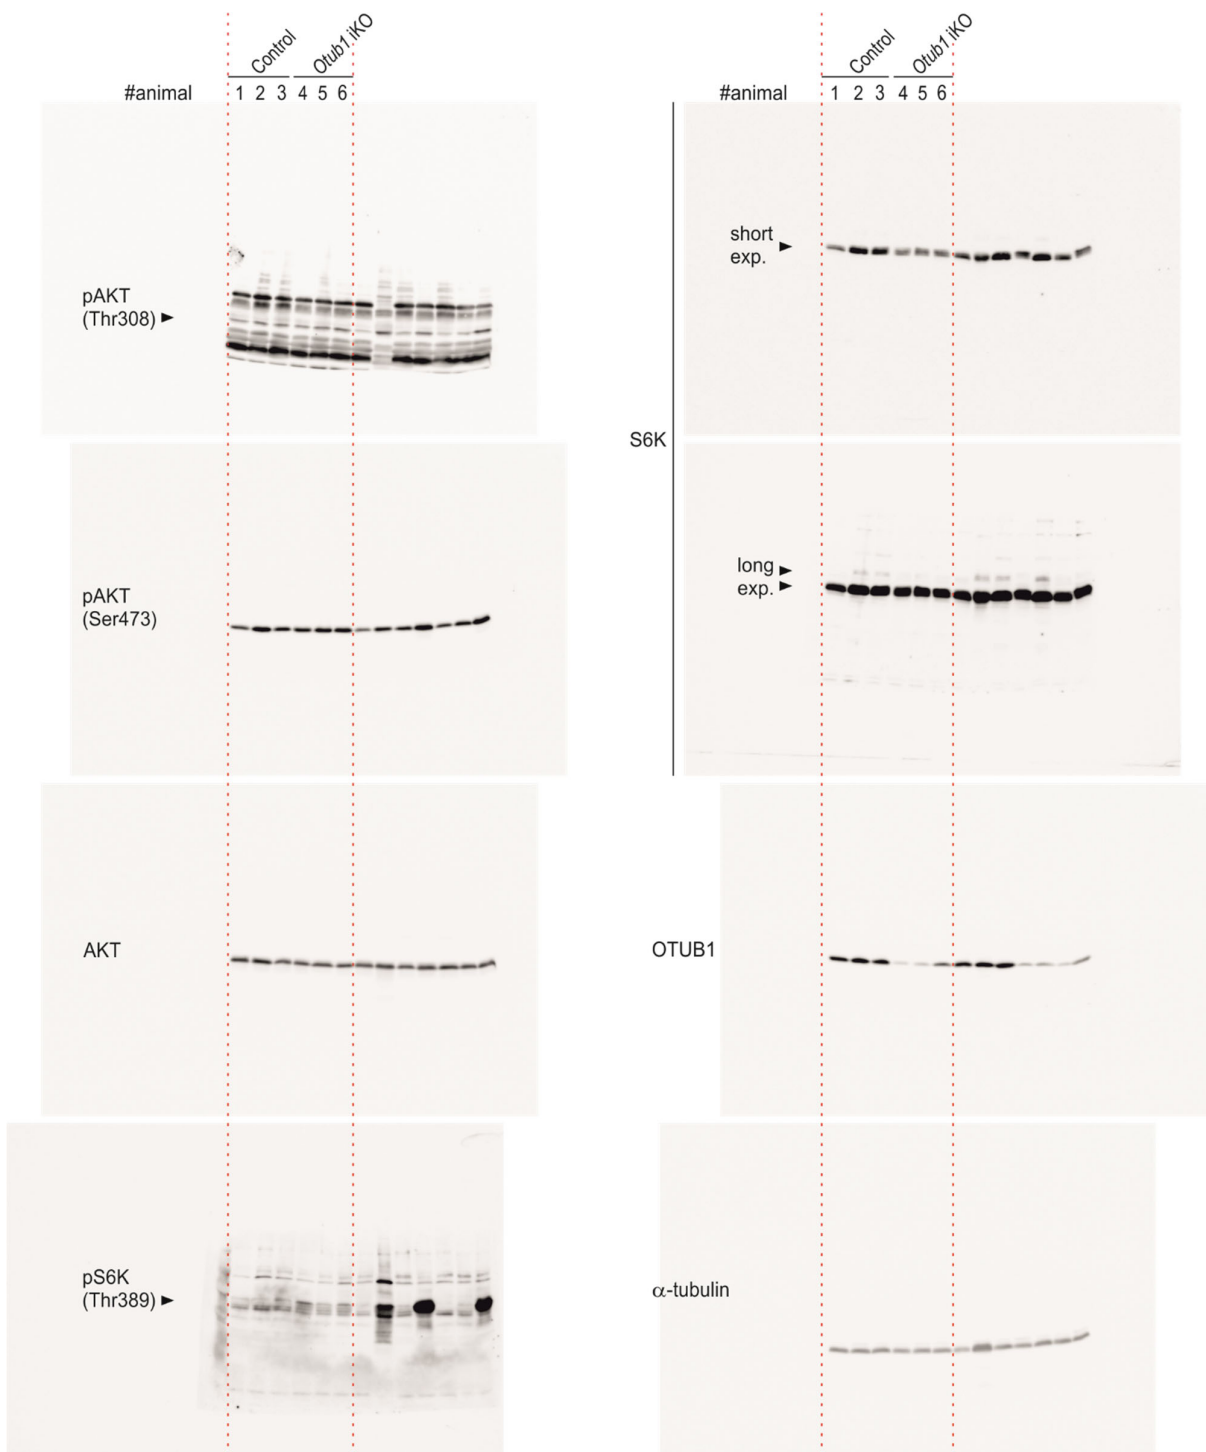

**Figure S10.** Full-length immunoblots of results shown in Figure S6A.

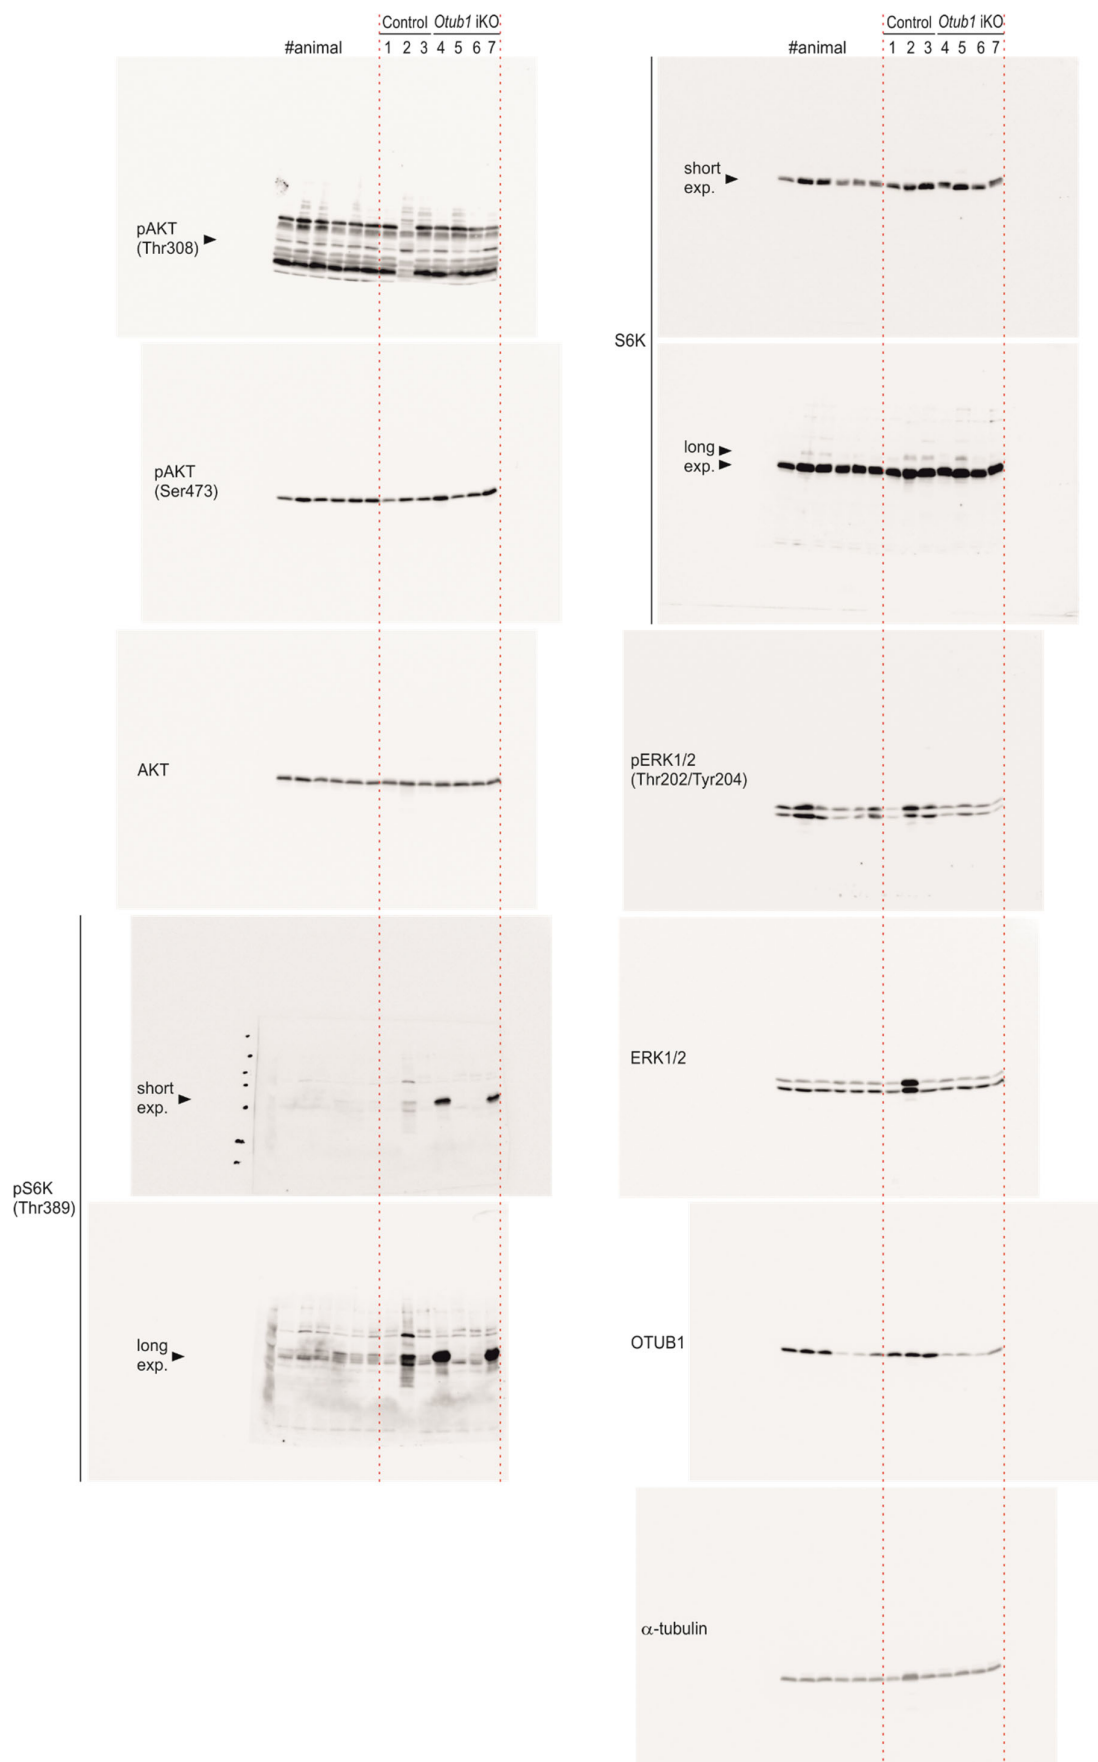

**Figure S11.** Full-length immunoblots of results shown in Figure S6B.
